# Supplementary material
Source: PubMed Central journal article supplement (PMC4881248)
Supplement: brc-0011-0108-s01.pdf [file brc-0011-0108-s01.pdf]

Online Supplemental Tables

**Supplemental Table 1.** Immune checkpoints and co-stimulatory molecules and their targeting agents

| Target                              | Agent <sup>a</sup>                                                                                                                                    | Ligand                                           | Agent <sup>a</sup>                                                                                                  |
|-------------------------------------|-------------------------------------------------------------------------------------------------------------------------------------------------------|--------------------------------------------------|---------------------------------------------------------------------------------------------------------------------|
| <i>Inhibitory molecules</i>         |                                                                                                                                                       |                                                  |                                                                                                                     |
| CTLA-4 (CD152)                      | Ipilimumab (trade name Yervoy)<br>Tremelimumab (Ticilimumab, CP-675,206)                                                                              | B7-1 (CD80),<br>B7-2 (CD86)                      | NA                                                                                                                  |
| PD-1 (CD279)                        | Nivolumab (ONO-4538, BMS-936558, or MDX1106; trade name Optivo)<br>Pembrolizumab (MK-3475 lambrolizumab, trade name Keytruda)<br>Pidilizumab (CT-011) | PD-L1 (CD274; B7-H1)<br><br>PD-L2 (CD273; B7-DC) | BMS-936559 (MDX-1105);<br>Atezolizumab (MPDL3280A);<br>Durvalumab (MEDI4736);<br>Avelumab (MSB00170718C);<br><br>NA |
| LAG-3 (CD223)                       | BMS-986016                                                                                                                                            | MHC class II                                     | NA                                                                                                                  |
| BTLA (CD272)                        | NA                                                                                                                                                    | HVEM, TNFRSF14, CD270                            | NA                                                                                                                  |
| CD160                               | NA                                                                                                                                                    | HVEM (CD270)                                     | NA                                                                                                                  |
| TIM-3 (CD366)                       | NA                                                                                                                                                    | Galectin-9                                       | NA                                                                                                                  |
| VISTA (B7-H5, PD-1 homolog, Dies 1) | NA                                                                                                                                                    | Unknown                                          |                                                                                                                     |
| B7-H3 (CD276)                       | MGA271                                                                                                                                                | Unknown                                          |                                                                                                                     |
| Unknown                             |                                                                                                                                                       | B7-H4                                            | NA                                                                                                                  |
| CD200R                              | NA                                                                                                                                                    | CD200 (OX2)                                      | Samalizumab (ALXN6000)                                                                                              |
| TIGIT (Visig 9, Vstm3, WUCAM)       | NA                                                                                                                                                    | PVR (CD155); PVRL2 (nectin-2; CD112 )            | NA                                                                                                                  |
| <i>Co-stimulatory molecules</i>     |                                                                                                                                                       |                                                  |                                                                                                                     |
| CD226                               | NA                                                                                                                                                    | PVR (CD155); PVRL2, nectin-2 (CD112 )            | NA                                                                                                                  |
| CD28                                | TGN1412                                                                                                                                               | B7-1 (CD80), B7-2 (CD86)                         | NA                                                                                                                  |
| OX-40                               | GSK3174998                                                                                                                                            | OX40-L                                           | NA                                                                                                                  |
| CD27 (TNFRSF7)                      | Valrilumab (CDX1127-06)                                                                                                                               | CD70                                             | NA                                                                                                                  |
| 4-1BB (CD137, TNFRSF9)              | PF-05082566<br>BMS-66513                                                                                                                              | 4-1BBL                                           | NA                                                                                                                  |
| ICOS (CD278)                        | NA                                                                                                                                                    | ICOSL, B7-H2 (CD275)                             | NA                                                                                                                  |
| LIGHT (TNFSF14)                     | NA                                                                                                                                                    | HVEM                                             | NA                                                                                                                  |
| LT $\alpha$                         | NA                                                                                                                                                    | HVEM                                             | NA                                                                                                                  |

<sup>a</sup>Clinically developed or under development agents.  
NA= not available.

**Online Supplemental Tables**

**Supplemental Table 2.** Expression of PD-L1 in breast cancer lesions

| Breast cancer lesion                | Number of samples analyzed | Frequency of PD-L1 <sup>a</sup>                                                                                                                                                                          | Clinical outcome relationship                                                                                                                                | Association with immune infiltrate <sup>b</sup> | Assay                      | PD-L1 positivity definition                                                                    | Bibliography            |
|-------------------------------------|----------------------------|----------------------------------------------------------------------------------------------------------------------------------------------------------------------------------------------------------|--------------------------------------------------------------------------------------------------------------------------------------------------------------|-------------------------------------------------|----------------------------|------------------------------------------------------------------------------------------------|-------------------------|
| Primary, stage I – III              | 44                         | Tumor: 22/44 (50) <sup>c</sup><br>TIL <sup>d</sup> : 18/44 (41)                                                                                                                                          | No association with clinical outcome                                                                                                                         | Positive                                        | IHC                        | Tumor: ≥1% membrane or cytoplasm staining<br>TIL: ≥1%                                          | Ghebeh et al., 2006     |
| Primary, Stage I-III                | 650                        | 152/650 (23.4 %) including the following subtypes:<br>Luminal A: 10/83 (12.1)<br>Luminal B HER2-: 63/309 (20.4)<br>Luminal B HER2+: 21/73 (28.8)<br>HERBB2-enriched: 19/56 (33.9)<br>TNBC: 39/127 (30.7) | PD-L1 was an independent negative prognostic factor for OS ( $p < 0.0001$ ) for different tumor subtypes except for luminal A breast cancer.                 | Positive                                        | IHC                        | Modified H-score with a range of possible scores from 0 to 300, using a cut-off score of ≥ 100 | Muenst et al., 2014     |
| TNBC                                | 105                        | 20/105 (19)                                                                                                                                                                                              | NA                                                                                                                                                           | Positive                                        | IHC                        | Tumor : ≥5% membrane staining                                                                  | Mittendorf et al., 2014 |
| Primary, Stage I-III                | 636                        | 382/636 (60)                                                                                                                                                                                             | PD-L1 expression was associated with longer RFS (log-rank $P = 0.01$ ),                                                                                      | Positive                                        | In situ mRNA hybridization | Automatic quantitative fluorescence (QIF) score of mRNA <sup>e</sup>                           | Schalper, et al., 2014  |
| Primary, Stage I-III <sup>f</sup>   | 116                        | Luminal A: 11/33 (33)<br>Luminal B: 8/25 (32)<br>HERBB2-enriched: 1/5 (20)<br>TNBC: 31/53 (59)                                                                                                           | NA                                                                                                                                                           | Positive <sup>g</sup>                           | IHC                        | Histo-Score (H-Score) from 1+ to 3+, membrane and/ or cytoplasm staining                       | Gatalica et al., 2014   |
| Invasive breast cancer, Stage I-III | 870                        | 189/870 (21,7) including the following subtypes:<br>Luminal A: 37/321 (11.5)<br>Luminal B HER2-: 27/314 (8.6)<br>Luminal B HER2+: 1/13 (7.7)<br>TNBC: 124/222 (55.9)                                     | PD-L1+ patients had poorer 5-year DFS (78.6% vs. 84.9%; $P = 0.012$ ), and OS (88% vs. 91.5%, $P < 0.001$ ) than those five-year of PD-L1-negative patients; | No correlation                                  | IHC                        | Tumor : ≥5% membrane staining with or without cytoplasm staining                               | Qin et al., 2015        |
| Primary, Stage I-III                | 3916                       | All cohort<br>Tumor: 66/3916 (1.7) <sup>h</sup><br>TIL: 235/3916 (6%)<br>TNBC                                                                                                                            | PD-L1 expression in >10% of immune cells was associated with reduced disease-specific mortality ( $P = 0.08$ )                                               | Positive                                        | IHC                        | Tumor : ≥1% membrane staining with or without cytoplasm staining                               | Ali et al., 2015        |

Online Supplemental Tables

| Breast cancer lesion                        | Number of samples analyzed | Frequency of PD-L1 <sup>a</sup>                                                                                                                                          | Clinical outcome relationship                                                                                                                         | Association with immune infiltrate <sup>b</sup> | Assay                                  | PD-L1 positivity definition                                                                                                           | Bibliography                |
|---------------------------------------------|----------------------------|--------------------------------------------------------------------------------------------------------------------------------------------------------------------------|-------------------------------------------------------------------------------------------------------------------------------------------------------|-------------------------------------------------|----------------------------------------|---------------------------------------------------------------------------------------------------------------------------------------|-----------------------------|
|                                             |                            | Tumor: 24/302 (8%)<br>TIL: 56/302 (19%)                                                                                                                                  |                                                                                                                                                       |                                                 |                                        |                                                                                                                                       |                             |
| TNBC                                        | 161                        | Tumor: 103/161 (64) membrane staining;<br>129/161 (80) cytoplasm staining;<br>TIL: 150/161 (93)                                                                          | Both tumor cytoplasmic and TIL expression of PD-L1 was associated with OS (0.032 and 0.0042, respectively)                                            | Positive                                        | IHC                                    | Tumor: ≥1% membrane or cytoplasm staining<br>TIL: ≥1% <sup>1</sup>                                                                    | Beckers et al., 2015        |
| Primary Invasive, Stage I-III               | 5454                       | 1076/5454 (20) including the following subtypes:<br>Luminal A: 133/1515 (8.7)<br>Luminal B: 186/1243 (15)<br>Basal-like: 453/1205 (37.6)<br>ERBB2-enriched: 227/841 (27) | PDL1 expression influenced MFS and OS (at 5 years 63 and 82%, respectively) in the basal-like subtype (P,<0.00005 and 0.0000003)                      | Positive                                        | mRNA expression by microarray analysis | Expression in T was compared with mean expression in NB: upregulation was defined by a T/NB ratio ≥2 <sup>1</sup>                     | Sabatier et al., 2015       |
| Invasive pre-treatment primary, stage I-III | 306                        | non-IBC: 54/194 (28)<br>IBC: 42/112 (38)                                                                                                                                 | <i>PDL-1</i> expression was associated with pCR: 50% in the "PDL1-high" group versus 22% in the "PDL1-low" groups (p = 0.03). No association with OS. | Positive                                        | mRNA expression by microarray analysis | Expression in T was compared with mean expression in NB: upregulation was defined by a T/NB ratio ≥2 <sup>1</sup>                     | Bertucci, et al., 2015      |
| Primary, stage I - III                      | 189                        | 107/189 (56,6)                                                                                                                                                           | PD-L1+ patients had improved OS (p=0.04)                                                                                                              | NA                                              | IHC                                    | An arbitrary score ranging from 0 to 8 was determined by the sum of scores for staining intensity and the percentage of stained cells | Baptista et al., 2016       |
|                                             | 43                         | Tumor: 9/43 (21);<br>TIL: 35/43 (81)                                                                                                                                     | No patient with PD-L1+ disease recurred, 15% of PD-L1- patients developed a distant recurrence                                                        | Positive                                        | IHC                                    | Tumor : ≥5% membrane staining<br>TIL: ≥5%                                                                                             | Cimino-Mathwes et al., 2016 |
| Primary, stage I-III (treatment)            |                            |                                                                                                                                                                          |                                                                                                                                                       |                                                 |                                        |                                                                                                                                       |                             |

**Online Supplemental Tables**

| Breast cancer lesion                     | Number of samples analyzed | Frequency of PD-L1 <sup>a</sup>                                                                       | Clinical outcome relationship                                     | Association with immune infiltrate <sup>b</sup> | Assay | PD-L1 positivity definition                                         | Bibliography                |
|------------------------------------------|----------------------------|-------------------------------------------------------------------------------------------------------|-------------------------------------------------------------------|-------------------------------------------------|-------|---------------------------------------------------------------------|-----------------------------|
| naïve)<br>Matched primary and metastatic | 26                         | Primary Tumor: 2/24 (8)<br>TIL: 14/26 (54);<br>high concordance with PD-L1+ TIL in metastatic lesions | NA                                                                | No correlation                                  | IHC   | Tumor : ≥5% membrane staining<br>TIL: ≥5%                           | Cimino-Mathwes et al., 2016 |
| Primary, Stage I-III                     | 316                        | 292/316 (92.4)                                                                                        | No significant association between PD-L1 expression and DFS or OS | Negative                                        | IHC   | Histo-Score (H-Score) from 1+ to 3+, membrane or cytoplasm staining | Park et al., 2016           |

<sup>a</sup>frequency of PD-L1 in specific subtypes is reported only for large studies; <sup>b</sup>association between PD-L1 expression and immune infiltration, positive= positive correlation; negative = inverse correlation; <sup>c</sup>number in parenthesis is the % of positive lesions; <sup>d</sup>tumor infiltrating lymphocytes (TIL); <sup>e</sup>automatic quantitative fluorescence (QIF) score of mRNA signal in the tumor was calculated by dividing the target mRNA pixel intensities with the area of the tumor compartment defined by the staining with cytokeratin. A cutoff for PD-L1 mRNA positivity was defined as the noise threshold of the system, determined by using the average QIF score of negative control bacterial gene; <sup>f</sup>the correlation was observed only for TNBC; <sup>g</sup>this analysis has been performed in tumors with different histological origin; <sup>h</sup>only for TNBC; <sup>i</sup>for additional tumors (METABRIC cohort) genomic data were available: among 44 of the previously defined IntClust10/Basal-like, 17 (39%) were PD-L1 immune cell positive; <sup>j</sup>the staining score of ≥5% was also used for PD-L1 staining and similar results were obtained (PD-L1 expression: 60% tumors with membrane staining, 77% tumors with cytoplasm staining and 93% of TILs; <sup>k</sup>T, tumor; NB, normal breast tissue.

IHC= Immunohistochemistry; OS= overall survival; NA= Not available; RFS: Recurrence-free survival; MFS: Metastasis free survival; IBC= Inflammatory breast cancer; non-IBC= non-inflammatory breast cancer; pCR: pathological complete response.

**Online Supplemental Tables**

**Supplemental Table 3.** Immune checkpoint agents under clinical development in breast cancer

| Target                      | Agent                                                           | Stage of clinical development                             | Tumor stage                                                             | Combination therapy                                                | Status    |
|-----------------------------|-----------------------------------------------------------------|-----------------------------------------------------------|-------------------------------------------------------------------------|--------------------------------------------------------------------|-----------|
| CTLA-4                      | Ipilimumab (trade name Yervoy)                                  | Phase I                                                   | Stage III and IV disease <sup>a</sup>                                   | Following allogeneic hematopoietic stem cell transplantation       | Completed |
|                             |                                                                 | Phase I                                                   | Early stage/resectable disease                                          | Single-dose Ipilimumab and/or cryoablation                         | Completed |
|                             | Tremelimumab (Ticilimumab, CP-675,206)                          | Phase I                                                   | Advanced hormone-responsive disease                                     | Exemestane                                                         | Completed |
| PD-1                        | Nivolumab (ONO-4538, BMS-936558, or MDX1106; trade name Optivo) | Phase II                                                  | Advanced disease <sup>a</sup>                                           | No                                                                 | Active    |
|                             |                                                                 | Phase I and II                                            | TNBC <sup>a</sup>                                                       | Etinostat (benzamide histone deacetylase inhibitor) and Ipilimumab | Active    |
|                             | Pembrolizumab (MK-3475; trade name Keytruda)                    | Phase I                                                   | Metastatic disease <sup>a</sup>                                         | Nab-paclitaxel                                                     | Active    |
|                             |                                                                 | Phase III                                                 | Metastatic TNBC                                                         | No                                                                 | Active    |
|                             | Atezolizumab (MPDL3280A)                                        | Phase I                                                   | HER-2 <sup>+</sup> metastatic disease                                   | No                                                                 | Active    |
|                             |                                                                 | Phase II                                                  | Metastatic TNBC                                                         | No                                                                 | Active    |
|                             |                                                                 | Phase I and II                                            | TNBC <sup>a</sup>                                                       | IDO inhibitor (INCB024360)                                         | Active    |
|                             |                                                                 | Phase I and II                                            | TNBC <sup>a</sup>                                                       | PLX3397 (multitargeted tyrosine kinase inhibitor)                  | Active    |
|                             |                                                                 | Phase I and II                                            | Metastatic TNBC                                                         | Eribulin mesylate (microtubule inhibitor)                          | Active    |
|                             |                                                                 | Phase II                                                  | Metastatic or recurrent inflammatory disease                            | <b>No</b>                                                          | Active    |
|                             |                                                                 | Phase II                                                  | Stage IV ER <sup>+</sup>                                                | Tamoxifen citrate and Vorinostat                                   | Active    |
|                             | Atezolizumab (MPDL3280A)                                        | Phase I                                                   | P53 <sup>+</sup> TNBC <sup>a</sup>                                      | p53MVA vaccine                                                     | Active    |
|                             |                                                                 | Phase I                                                   | Metastatic disease                                                      | Hypofractionated radiotherapy                                      | Active    |
|                             |                                                                 | Phase I                                                   | Metastatic TNBC                                                         | No                                                                 |           |
|                             |                                                                 | Phase III                                                 | Previously untreated metastatic TNBC                                    | Chemotherapy                                                       | Active    |
| Phase I                     |                                                                 | Advanced disease <sup>a</sup>                             | Bevacizumab and/or chemotherapy                                         | Active                                                             |           |
| Phase I                     |                                                                 | Advanced TNBC <sup>a</sup>                                | IDO inhibitor GDC0919                                                   | Active                                                             |           |
| Phase I                     |                                                                 | HER-2 <sup>+</sup> metastatic or locally advanced disease | Trastuzumab, and Per-tuzumab or Atezolizumab and Trastuzumab Em-tansine | Active                                                             |           |
| Phase I and II <sup>a</sup> |                                                                 | Relapsed or refractory Her-2 <sup>+</sup> or TNBC         | Ibrutinib                                                               | Active                                                             |           |
| Phase II                    |                                                                 | TNBC before surgery                                       | Paclitaxel albumin-stabilized nanoparticles                             | Approved-not yet active                                            |           |

**Online Supplemental Tables**

| Target | Agent                   | Stage of clinical development | Tumor stage                                                     | Combination therapy                                                                | Status                  |
|--------|-------------------------|-------------------------------|-----------------------------------------------------------------|------------------------------------------------------------------------------------|-------------------------|
|        | Durvalumab (MEDI4736)   | Phase I                       | Metastatic relapsed or refractory disease <sup>a</sup>          | Hypofractionated radiotherapy and Tremelimumab                                     | Active                  |
|        |                         | Phase I and II                | Advanced measurable disease with accessible biopsy <sup>a</sup> | Toll-like receptor agonist PolyICLC and Tremelimumab                               | Approved-not yet active |
|        |                         | Phase I and II                | Stage I-III TNBC                                                | Nab-paclitaxel followed by MEDI4736 concomitant with ddAC neoadjuvant chemotherapy | Approved-not yet active |
|        | Avelumab (MSB00170718C) | Phase I                       | Metastatic or locally advanced disease <sup>a</sup>             | No                                                                                 | Active                  |
| OX-40  | GSK3174998              | Phase I                       | Advanced TNBC <sup>a</sup>                                      | Pembrolizumab                                                                      | Active                  |
| CD27   | Valrilumab (CDX1127-06) | Phase I and II                | Advanced disease <sup>a</sup>                                   | Atezolizumab                                                                       | Active                  |

TNBC= Triple negative breast cancer.

<sup>a</sup>Enrolling subjects with different types of tumor.
